# Supplementary material
Source: PubMed Central journal article supplement (PMC4909558)
Supplement: supp_WNL.0000000000002775_2222.pdf [file supp_WNL.0000000000002775_2222.pdf]

# Neurexin-3 $\alpha$

## A new antibody target in autoimmune encephalitis

Patrick J. Waters, PhD  
Sarosh R. Irani, DPhil,  
MRCP (Neurol)

Correspondence to  
Dr. Waters:  
paddy.waters@ndcn.ox.ac.uk

*Neurology*® 2016;86:2222–2223

Acute encephalitis is an inflammatory brain disease with a complex differential diagnosis associated with appreciable morbidity, mortality, and costs. Infectious agents, particularly viruses, were traditionally considered the predominant causes. The discovery of neuronal cell-surface autoantibodies (NSAbs) has helped identify a subgroup of patients with encephalitis who often respond well to immunotherapy. Autoantibodies were not mentioned in a 2007 retrospective study on the causes of acute encephalitis, but 3 years later the same authors reported that 8% of cases were associated with autoantibodies against the voltage-gated potassium channel complex and the NMDA receptor (NMDAR).<sup>1,2</sup> In subsequent years, several new targets have been reported in patients with encephalitis. In approximate order of decreasing frequency, these include the NMDAR, leucine-rich, glioma inactivated 1 (LGI1), gamma aminobutyric acid receptor B (GABA<sub>B</sub>R), contactin-associated protein-like 2 (CASPR2), gamma aminobutyric acid receptor A (GABA<sub>A</sub>R), dipeptidyl aminopeptidase-like protein 6 (DPPX), metabotropic glutamate receptor 5 (mGluR5), and the dopamine 2 receptor (D2R).<sup>3,4</sup>

In this issue of *Neurology*®, Gresa-Arribas et al.<sup>5</sup> add neurexin-3 $\alpha$  to this growing list of autoantibody targets in encephalitis. They identified 5 patients over 10 years whose serum and CSF demonstrated distinctive immunoreactivity to rat neuropil. Neurexin-3 $\alpha$  was the antibody target by immunoprecipitation and mass spectrometry, and this was confirmed by cell-based assay.

The patients with neurexin-3 $\alpha$  antibodies showed a phenotype reminiscent of those with NMDAR antibodies, with an infectious prodrome followed by cognitive dysfunction, seizures, reduced consciousness, and orofacial dyskinesias sometimes following a severe clinical course; patients often have a lymphocytic pleocytosis and normal brain MRI. Despite the absence of prominent psychiatric features, a more diffuse movement disorder, and dysautonomia, these patients meet newly published criteria for probable NMDAR-antibody encephalitis<sup>6</sup> and may constitute a proportion of patients with seronegative mimics of

NMDAR-antibody encephalitis. Indeed, this is a recognized clinical cohort, and although 179 patients with well-characterized or suspected autoimmune encephalitis did not have neurexin-3 $\alpha$  antibodies, the authors do not state whether these patients had an NMDAR-antibody encephalitis-like phenotype.

Neurexins are a family of predominantly presynaptic cell-surface glycoproteins encoded by 3 large genes.<sup>7,8</sup> Each gene encodes an  $\alpha$  or a  $\beta$  transcript, giving rise to 6 transcripts that can produce nearly 4,000 proteins by differential splicing. Neurexin-3 $\alpha$ , the largest and most polymorphic member of the family, covers almost 2% of chromosome 14 and accounts for 74% of all possible splice variants. These large proteins interact across the synaptic cleft with postsynaptic adhesion proteins via their polymorphic extracellular N-terminal domains. This adds to the growing repertoire of cell adhesion molecules, including CASPR2, contactin-2, and neurofascins, which are known autoantibody targets. In addition to this function, neurexins modulate presynaptic Ca<sup>2+</sup> channel function and neurotransmitter release via their conserved C-terminus. The authors showed a direct effect of neurexin-3 $\alpha$  antibodies on cultured neurons, with a reduction in surface-expressed neurexin-3 $\alpha$  in both developing and mature neurons. The finding of reduced synapse number in developing neurons may not have clinical relevance given the adult phenotype of the condition. However, in vivo investigations may help explain how loss of neurexin-3 $\alpha$  alters neuronal function and consequently may inform the molecular basis of the clinical phenotype.

The identification of these antibodies is potentially important to the clinical workup of patients with encephalitis because it is likely that they define another NSAb-mediated nonparaneoplastic disorder with direct implications for the use of immunotherapies.<sup>3,6,9</sup> However, the detection of only 5 patients in 10 years in a specialist center suggests that this disorder is uncommon. Perhaps common autoantibody discovery in encephalitis is reaching its nadir rather than being an expanding future entity. A resultant broader question in the field is whether this type of incremental approach to antibody discovery will

See page 2235

From the University of Oxford, United Kingdom.

Go to [Neurology.org](http://Neurology.org) for full disclosures. Funding information and disclosures deemed relevant by the authors, if any, are provided at the end of the editorial.

substantially benefit patients or whether time and money is better utilized in systematically investigating the effects of therapies and clinical outcomes of established autoimmune diseases.

Many diagnostic centers have developed autoantibody assays, but multicenter evaluation of the reproducibility or consistency of different antibody assays has been performed only for neuromyelitis optica.<sup>10</sup> Debates continue as to whether live or fixed mammalian cells expressing the target or brain tissue sections are preferred as the substrate, and whether microscopy or quantitative flow cytometry is the optimal detection method. Primary neuronal culture immunofluorescence is used in specialist centers to increase the confidence in a positive conventional assay result, but multiple testing may reduce overall sensitivity and select for patients with higher antibody titers. On the other hand, use of single assays alone has an increased risk of generating positive results in patients without autoimmune syndromes. Future studies will be needed to determine assay relevance in nonautoimmune diseases.<sup>11</sup>

Gresa-Arribas et al. have identified a likely pathogenic antibody target in autoimmune encephalitis and an assay that will allow future definition of the neurexin-3 $\alpha$  antibody-associated disease spectrum, including mimics of NMDAR-antibody encephalitis. Future research efforts should aim to develop high-throughput screening methods for NSAb detection to ensure we capture the full variety of antigenic synaptic, axonal, and glial proteins. With such developments comes the need for rigorous multicenter studies examining the relative merits of antibody detection methodologies and their ongoing consistency.

#### STUDY FUNDING

No targeted funding reported.

#### DISCLOSURE

P.J.W. is supported by the NHS National Specialised Commissioning Group for Neuromyelitis optica, UK and by the NIHR Oxford Biomedical Research Centre. S.R.I. is supported by the Wellcome Trust, British

Medical Association Research grant, Vera Down grant, and Epilepsy Research UK. P.J.W. and S.R.I. are named inventors on patents for antibody assays. P.J.W. and S.R.I. have received royalties. P.J.W. has received speaker honoraria from Biogen Idec and Euroimmun AG and travel grants from the Guthy-Jackson Charitable Foundation. S.R.I. has received honoraria from MedImmune and speaker honoraria from the movement disorder society and Bethel Epilepsy Symposium. Go to Neurology.org for full disclosures.

#### REFERENCES

1. Granerod J, Crowcroft NS. The epidemiology of acute encephalitis. *Neuropsychol Rehabil* 2007;17:406–428.
2. Granerod J, Ambrose HE, Davies NW, et al. Causes of encephalitis and differences in their clinical presentation in England: a multicentre, population-based prospective study. *Lancet Infect Dis* 2010;10:835–844.
3. Leypoldt F, Armangue T, Dalmau J. Autoimmune encephalopathies. *Ann NY Acad Sci* 2015;1338:94–114.
4. Pettingill P, Kramer HB, Coeberg JA, et al. Antibodies to GABAA receptor  $\alpha$ 1 and  $\gamma$ 2 subunits: clinical and serologic characterization. *Neurology* 2015;84:1233–1241.
5. Gresa-Arribas N, Planagumà J, Petit-Pedrol M, et al. Human neurexin-3 $\alpha$  antibodies associate with encephalitis and alter synapse development. *Neurology* 2016;86:2235–2242.
6. Graus F, Titulaer MJ, Balu R, et al. A clinical approach to diagnosis of autoimmune encephalitis. *Lancet Neurol* 2016;15:391–404.
7. Missler M, Zhang W, Rohlmann A, et al. Alpha-neurexins couple Ca<sup>2+</sup> channels to synaptic vesicle exocytosis. *Nature* 2003;423:939–948.
8. Reissner C, Runkel F, Missler M. Neurexins. *Genome Biol* 2013;14:213.
9. Irani SR, Gelfand JM, Al-Diwani A, Vincent A. Cell-surface central nervous system autoantibodies: clinical relevance and emerging paradigms. *Ann Neurol* 2014;76:168–184.
10. Waters P, Reindl M, Saiz A, et al. Multicentre comparison of a diagnostic assay: aquaporin-4 antibodies in neuromyelitis optica. *J Neurol Neurosurg Psychiatry* Epub 2016 Apr 25. doi: 10.1136/jnnp-2015-312601.
11. Dahm L, Ott C, Steiner J, et al. Seroprevalence of autoantibodies against brain antigens in health and disease. *Ann Neurol* 2014;76:82–94.
